# Supplementary material
Source: PubMed Central journal article supplement (PMC4482779)
Supplement: NIHMS691602-supplement-2.pdf [file NIHMS691602-supplement-2.pdf]

## Supplementary Tables

**Table S1: Patients.** Demographics, pathology and neuropsychological evaluation. Abbreviations: Hand: Dominant handedness. Tests indicated with n/a were not performed for clinical reasons. WAIS-III: IQ scores from the Wechsler Adult Intelligence Scale: performance IQ (PIQ), verbal IQ (VIQ), full scale IQ (FSIQ), verbal comprehension index (VCI), perceptual organization index (POI). All WAIS-III scores are on average 100 with a s.d. of 15 in the normal population (69 and less falls in the clinically abnormal range, 70-79 borderline, 80-89 low average, 90-109 average, 110-119 high average, 120-129 superior, 130+ very superior). WMS-R and WMS-III are the Wechsler memory scale revised and version 3, respectively. Subtests are verbal paired associates (VPA), logical memory (LM) and visual reproduction (Vis). 1 and 2 are immediate and delayed, respectively. Scores are raw scores.

| ID  | Age | Sex | Hand Dom | Epilepsy Diagnosis        | WAIS-III / WAIS-IV (*) |     |     |     |      | WMS-R / WMS-III (*) |      |     |     |      |      |
|-----|-----|-----|----------|---------------------------|------------------------|-----|-----|-----|------|---------------------|------|-----|-----|------|------|
|     |     |     |          |                           | PIQ                    | VIQ | VCI | POI | FSIQ | VPA1                | VPA2 | LM1 | LM2 | Vis1 | Vis2 |
| H09 | 55  | M   | R        | right temporal            | 97                     | 98  | 100 | 103 | 98   | 18                  | 7    | 22  | 14  | 31   | 25   |
| H10 | 37  | M   | R        | Left frontal              | 79                     | 64  | n/a | n/a | 68   | n/a                 | n/a  | n/a | n/a | n/a  | n/a  |
| H11 | 16  | M   | L        | right lateral frontal     | 84                     | 91  | 88  | 84  | 88   | 17                  | 8    | n/a | n/a | 31   | 29   |
| H14 | 31  | M   | L        | Bilateral indep. temporal | n/a                    | n/a | 112 | 111 | n/a  | 11                  | 6    | 18  | 11  | 40   | 16   |
| H15 | 45  | M   | R        | Right mesial temporal     | 64                     | 59  | 59  | 69  | 58   | n/a                 | n/a  | n/a | n/a | 30   | 13   |
| H16 | 34  | F   | R        | right frontal             | 84                     | 68  | 68  | 89  | 74   | 8                   | 5    | 16  | 10  | n/a  | n/a  |
| H17 | 19  | M   | R        | left inferior frontal     | 128                    | 131 | 122 | 133 | 134  | 24                  | 6    | 34  | 37  | 40   | 39   |
| H18 | 40  | M   | R        | Right temporal            | 69                     | n/a | n/a | n/a | n/a  | n/a                 | n/a  | n/a | n/a | 25   | 8    |
| H19 | 34  | M   | R        | Left frontal              | 81                     | 74  | 76  | 80  | 86   | n/a                 | n/a  | 20  | 19  | 35   | 32   |
| H21 | 20  | M   | R        | Not localized             | n/a                    | n/a | 93  | 89  | n/a  | 23                  | 8    | 34  | 33  | 34   | 32   |
| H23 | 35  | M   | R        | Left temporal             | n/a                    | n/a | 74  | 86  | n/a  | 11                  | 3    | 13  | 4   | 34   | 32   |
| H27 | 41  | M   | R        | Bilateral indep. temporal | 86                     | 91  | 86  | 88  | 89   | n/a                 | n/a  | n/a | n/a | n/a  | n/a  |
| H28 | 23  | M   | R        | Right mesial temporal     | 79                     | 77  | 78  | 80  | 76   | n/a                 | n/a  | n/a | n/a | n/a  | n/a  |
| H29 | 18  | F   | L        | Left deep insula          | 104                    | 110 | 107 | 101 | 107  | n/a                 | n/a  | n/a | n/a | n/a  | n/a  |
| H31 | 30  | M   | R        | Right temporal            | n/a                    | n/a | n/a | n/a | n/a  | n/a                 | n/a  | n/a | n/a | n/a  | n/a  |
| H33 | 29  | M   | R        | Left temporal             | 113                    | 104 | 101 | 123 | 108  | 11                  | 5    | 21  | 15  | 41   | 41   |
| H41 | 19  | M   | R        | Right posterior temporal  | 92                     | 100 | 107 | 95  | 97   | 22                  | 6    | 31  | 27  | 36   | 37   |
| H42 | 29  | M   | R        | Not localized             | 87                     | 75  | 78  | 91  | 79   | 16                  | 6    | 22  | 14  | 37   | 36   |
| H43 | 27  | F   | L        | Left temporal             | n/a                    | n/a | 84  | 86  | n/a  | 19                  | 8    | 18  | 17  | 30   | 24   |
| H44 | 58  | F   | L        | Right temporal            | 74                     | 77  | 72  | 78  | 74   | 12                  | 5    | 10  | 3   | 34   | 28   |
| C24 | 47  | F   | n/a      | Not localized             | n/a                    | n/a | n/a | n/a | n/a  | n/a                 | n/a  | n/a | n/a | n/a  | n/a  |
| C25 | 36  | F   | R        | Bilateral indep. temporal | 107                    | 105 | 107 | 105 | 107  | 19*                 | 8*   | 29* | 30* | 38*  | 38*  |
| C26 | 56  | F   | L        | Right temporal            | 107                    | 92  | 96  | 109 | 99   | 15*                 | 6*   | 26* | 17* | 35*  | 33*  |
| C27 | 45  | M   | R        | Left temporal             | 79                     | 61  | 57  | 80  | 66   | n/a                 | n/a  | n/a | 1*  | 17*  | 11*  |
| C29 | 19  | M   | R        | Left temporal neocortical | 113                    | 95  | 89  | 121 | 103  | 20*                 | 8*   | 19* | 19* | 37*  | 38*  |

|     |    |   |   |                             |     |     |     |     |     |     |     |     |     |     |     |
|-----|----|---|---|-----------------------------|-----|-----|-----|-----|-----|-----|-----|-----|-----|-----|-----|
| C31 | 31 | M | R | Left temporal neocortical   | n/a | n/a | 72* | 79* | 69* | 21* | 10* | n/a | n/a | n/a | n/a |
| C32 | 19 | M | R | Not localized (generalized) | n/a | n/a | 83* | n/a | 80* | 22* | 18* | n/a | n/a | n/a | n/a |
| C33 | 44 | F | R | Right temporal              | 99  | 76  | 80  | 103 | 85  | 19* | 5*  | 20* | 24* | 35* | 28* |

**Table S2: Electrophysiological properties of neurons.** Abbreviations are: visually selective (VS), memory selective (MS). Firing rates are over the duration of the experiment (overall) or mean rates across all correct trials of a neuron (baseline period is 1s before stimulus onset, stimulus period is 1.5s long starting 200ms after stimulus onset). P-values (right column) specify the likelihood of observing this many selective cells by chance by repeating the same selection procedure after randomly permuting the order of trials (1000 runs). \* = Bootstrap p-values are set to 1/N where N=number of runs if none of the bootstrap samples contained more cells that observed.

|                               | Nr of neurons | Overall firing rate $\pm$ sd (Range) [Hz] | Baseline rate $\pm$ sd (Range) [Hz] | Post-Stimulus rate $\pm$ sd (Range) [Hz] | p-value bootstrap, nr significant cells |
|-------------------------------|---------------|-------------------------------------------|-------------------------------------|------------------------------------------|-----------------------------------------|
| <b>All sessions (Group 0)</b> | 1065          | 1.84 $\pm$ 2.66 (0.01-23.68)              | 1.79 $\pm$ 2.66 (0-26.19)           | 1.93 $\pm$ 2.80 (0-22.20)                | -                                       |
| <b>Behavioral Group 1</b>     | 954           | 1.72 $\pm$ 2.40 (0.01-19.71)              | 1.68 $\pm$ 2.39 (0-20.38)           | 1.81 $\pm$ 2.57 (0-22.20)                | -                                       |
| <b>Behavioral Group 2</b>     | 664           | 1.69 $\pm$ 2.47 (0.02-19.7)               | 1.65 $\pm$ 2.48 (0-20.38)           | 1.76 $\pm$ 2.63 (0-22.20)                | -                                       |
| <b>VS Neurons in Group 0</b>  | 186           | 2.28 $\pm$ 2.90 (0.05-23.68)              | 2.22 $\pm$ 2.94 (0.01-26.19)        | 2.40 $\pm$ 3.00 (0.02-21.63)             | 0.001                                   |
| <b>MS Neurons in Group 0</b>  | 87            | 2.35 $\pm$ 3.09 (0.03-19.71)              | 2.35 $\pm$ 3.15 (0.03-20.38)        | 2.40 $\pm$ 3.14 (0.03-18.81)             | 0.003                                   |
| <b>VS Neurons in Group 1</b>  | 168           | 2.14 $\pm$ 2.28 (0.05-11.80)              | 2.07 $\pm$ 2.20 (0.01-12.04)        | 2.26 $\pm$ 2.53 (0.02-13.90)             | 0.001*                                  |
| <b>MS Neurons in Group 1</b>  | 81            | 2.44 $\pm$ 3.18 (0.03-19.71)              | 2.44 $\pm$ 3.24 (0.03-20.38)        | 2.48 $\pm$ 3.24 (0.03-18.81)             | 0.001                                   |
| <b>VS Neurons in Group 2</b>  | 128           | 1.95 $\pm$ 2.09 (0.05-10.66)              | 1.90 $\pm$ 2.00 (0.01-10.46)        | 2.06 $\pm$ 2.35 (0.03-13.90)             | 0.001*                                  |
| <b>MS Neurons in Group 2</b>  | 65            | 2.36 $\pm$ 3.30 (0.10-19.71)              | 2.37 $\pm$ 3.36 (0.06-20.38)        | 2.38 $\pm$ 3.31 (0.08-18.81)             | 0.001*                                  |

**Table S3: Comparison of VS and MS neurons.** Here, only the subgroup of MS and VS neurons used for the comparison of extracellular waveforms are used (see results). All errors are  $\pm$ s.d.

|                                 | MS neurons         | VS neurons         | p-value |
|---------------------------------|--------------------|--------------------|---------|
| <b>Mean firing rate</b>         | 2.00 $\pm$ 2.51 Hz | 1.87 $\pm$ 2.09 Hz | ns      |
| <b>Proportion of small ISIs</b> | 0.25 $\pm$ 0.37    | 0.20 $\pm$ 0.35    | ns      |
| <b>CV2</b>                      | 0.95 $\pm$ 0.13    | vs 0.93 $\pm$ 0.17 | ns      |
| <b>Peak SNR</b>                 | 5.80 $\pm$ 4.46    | 6.90 $\pm$ 5.43    | ns      |
| <b>Burst index</b>              | 0.02 $\pm$ 0.02    | 0.03 $\pm$ 0.05    | ns      |

**Table S4:** Total number of neurons recorded in each area and hemisphere. Numbers show total number recorded in all sessions (Group 0). Numbers in brackets are those recorded from pathological tissue. Neurons were counted if the patient was diagnosed with uni-or bilateral temporal seizure onset, regardless of whether the focus was medial or lateral.

|              | <b>Hippocampus</b> | <b>Amygdala</b> |
|--------------|--------------------|-----------------|
| <b>Left</b>  | 207 (62)           | 304 (94)        |
| <b>Right</b> | 212 (124)          | 342 (121)       |
| <b>Total</b> | 419                | 646             |
